# Supplementary material
Source: PubMed Central journal article supplement (PMC6428276)

| Patient | gender | Age (years) | location   | Tumor H&E                                                                           | Organoid H&E                                                                          |
|---------|--------|-------------|------------|-------------------------------------------------------------------------------------|---------------------------------------------------------------------------------------|
| 5       | M      | 86          | Ascending  | nd                                                                                  | nd                                                                                    |
| 6       | M      | 73          | Ascending  | 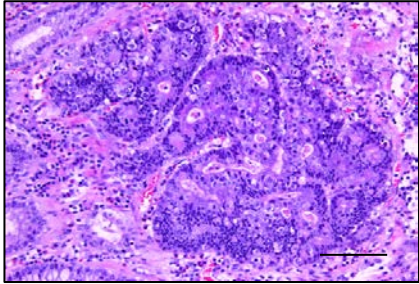   |    |
| 7       | F      | 81          | Ascending  |   |   |
| 8       | F      | 71          | Descending |  |  |
| 9       | M      | 64          | Ascending  |  |  |

10 F 59

Sigmoid

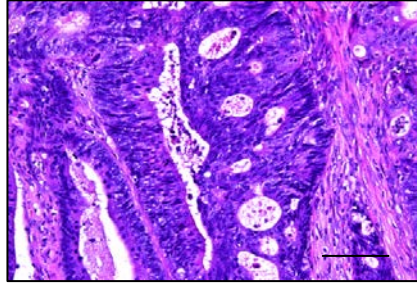

nd

11 F 60

Sigmoid

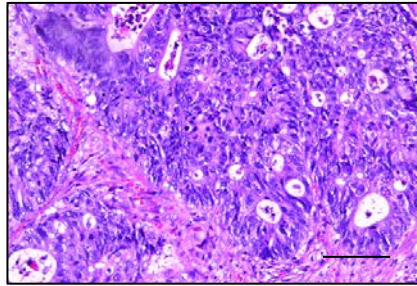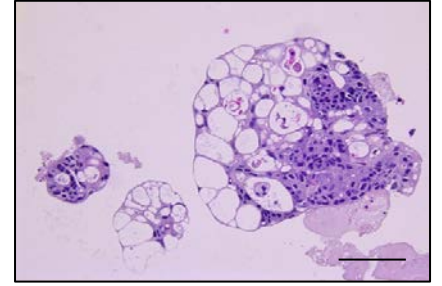

14 F 67

Ascending

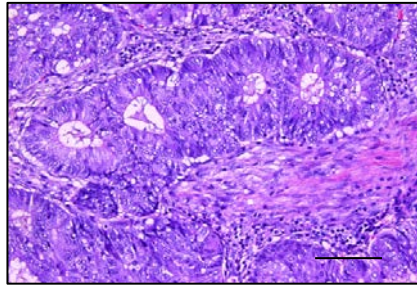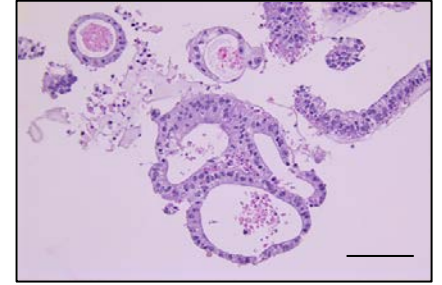

16 M 67

sigmoid

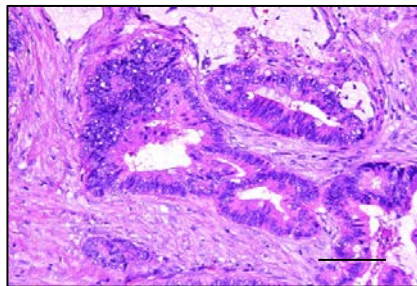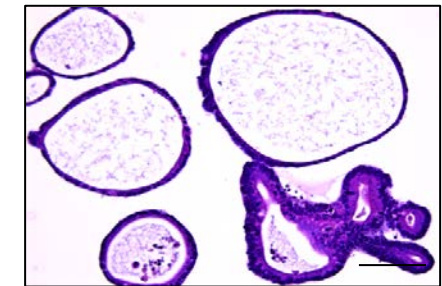

17 M 83

sigmoid

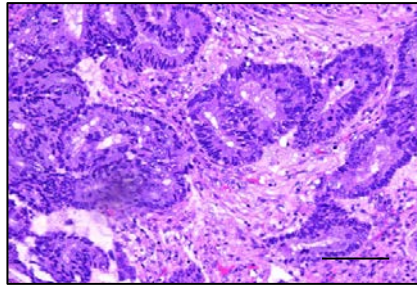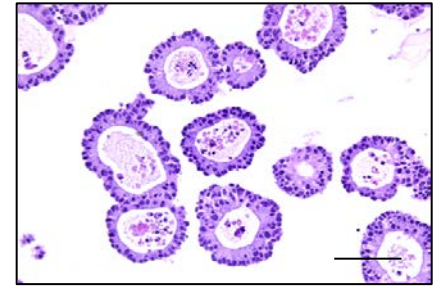



18 M 68

sigmoid

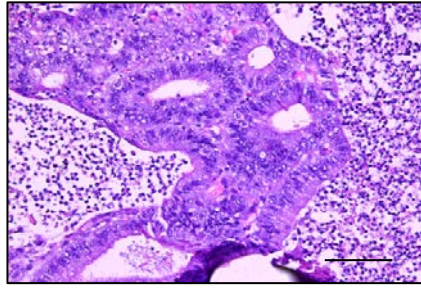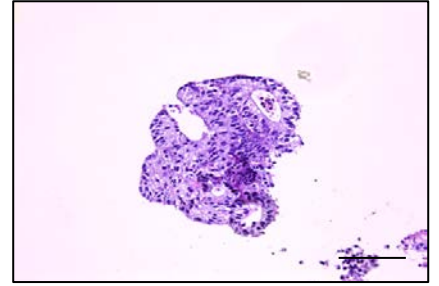

19 a F 82

Ascending

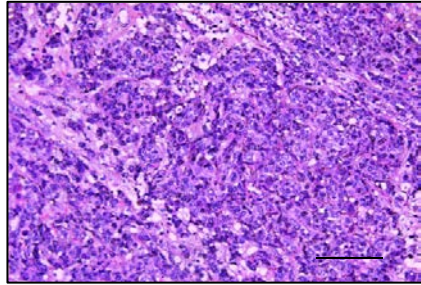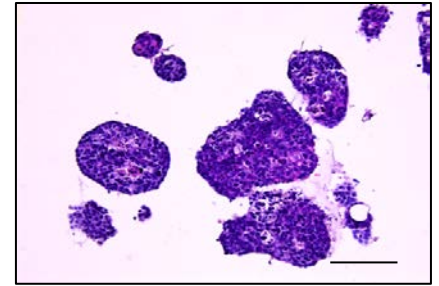

19 b F 82

Ascending

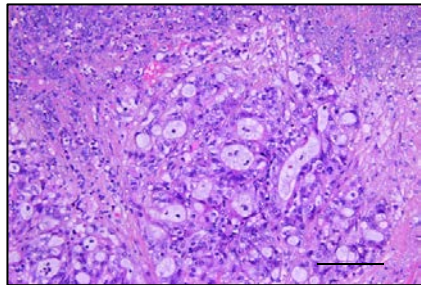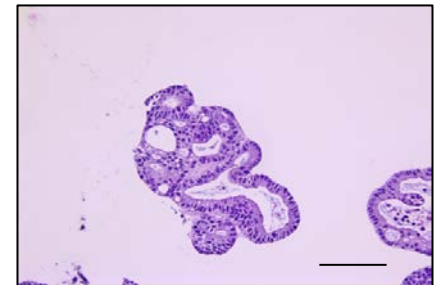

20 F 78

sigmoid

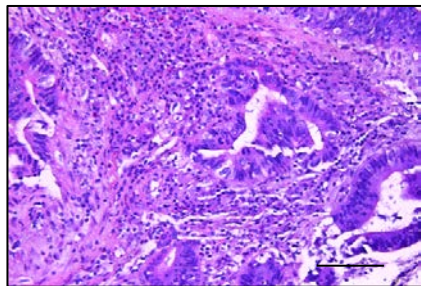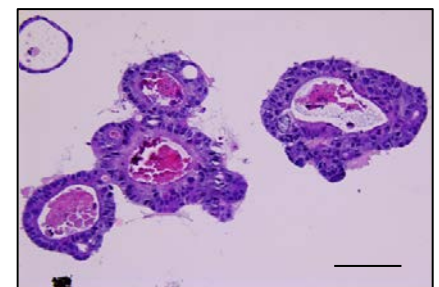

23 F 71

Ascending

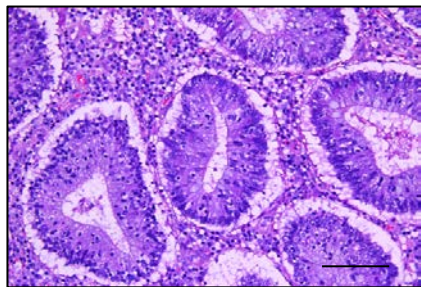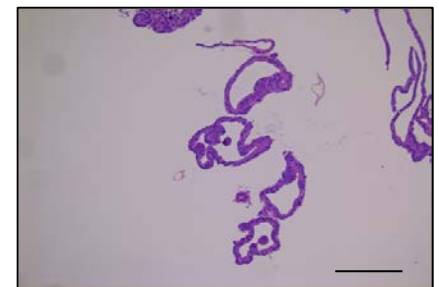

24 a F 60 Sigmoid

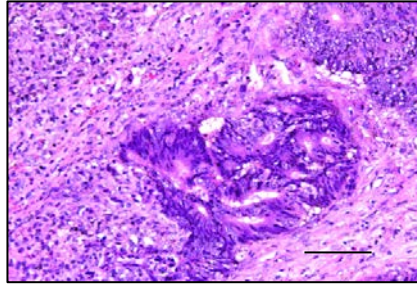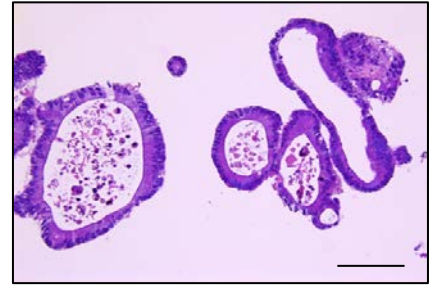

24 b F 60 Sigmoid

nd

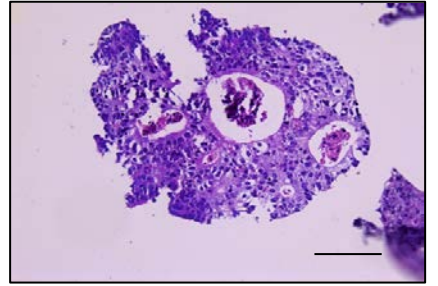

25 m 75 Rectosigmoid

nd

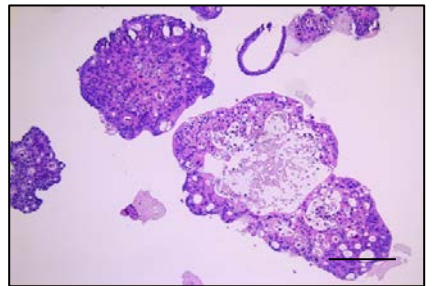

26 f 72 Ascending

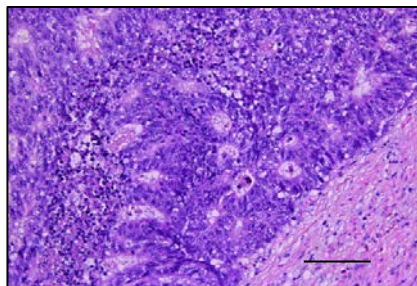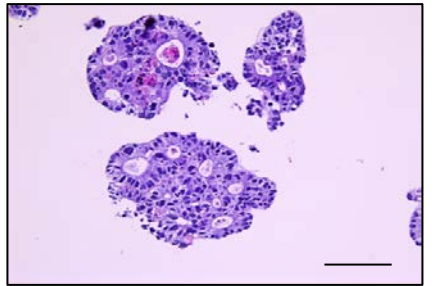

27 m 72 Ascending

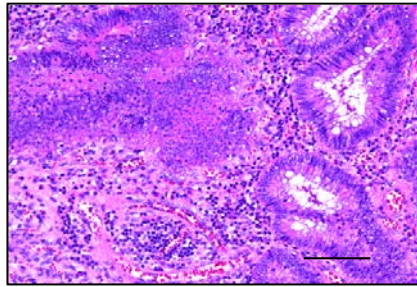

nd

28

m

72

Ascending

nd

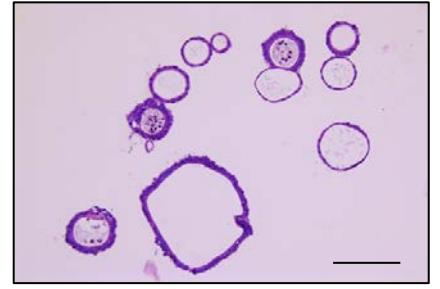

31

M

81

Ascending

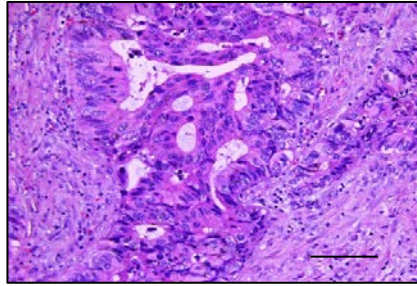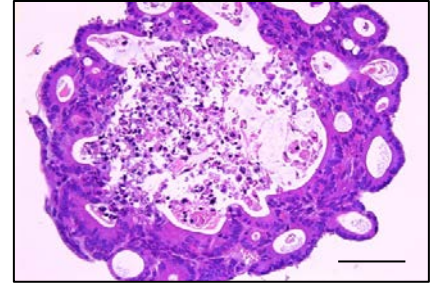

Supplemental data file S1B

| Organoid | KI67 (%) | OLFM4 (%) | KRT20 (%) | Alcian Blue (%) |
|----------|----------|-----------|-----------|-----------------|
| P6       | 75       | <5        | >90       | 0               |
| P8       | >90      | <1        | 75        | <1              |
| P9       | 50       | <5        | >90       | <1              |
| P11      | <50      | <1        | 50        | <5              |
| P14      | 10       | 10        | 50        | 0               |
| P16      | 75       | 5         | >90       | <5              |
| P17      | >90      | <5        | 75        | 0               |
| P18      | 75       | <1        | 25        | 0               |
| P19A     | 75       | <1        | 50        | 0               |
| P19B     | 75       | 50        | <5        | <5              |
| P20      | 20       | <5        | >90       | 0               |
| P23      | 75       | 50        | >90       | 0               |
| P24A     | 10       | <5        | <5        | <1              |
| P24B     | 50       | <5        | 50        | 0               |
| P25      | 50       | <5        | >90       | <1              |
| P26      | >90      | <1        | 10        | 0               |
| P28      | 75       | 5         | 75        | <1              |
| P31      | nd       | 30        | >90       | <1              |



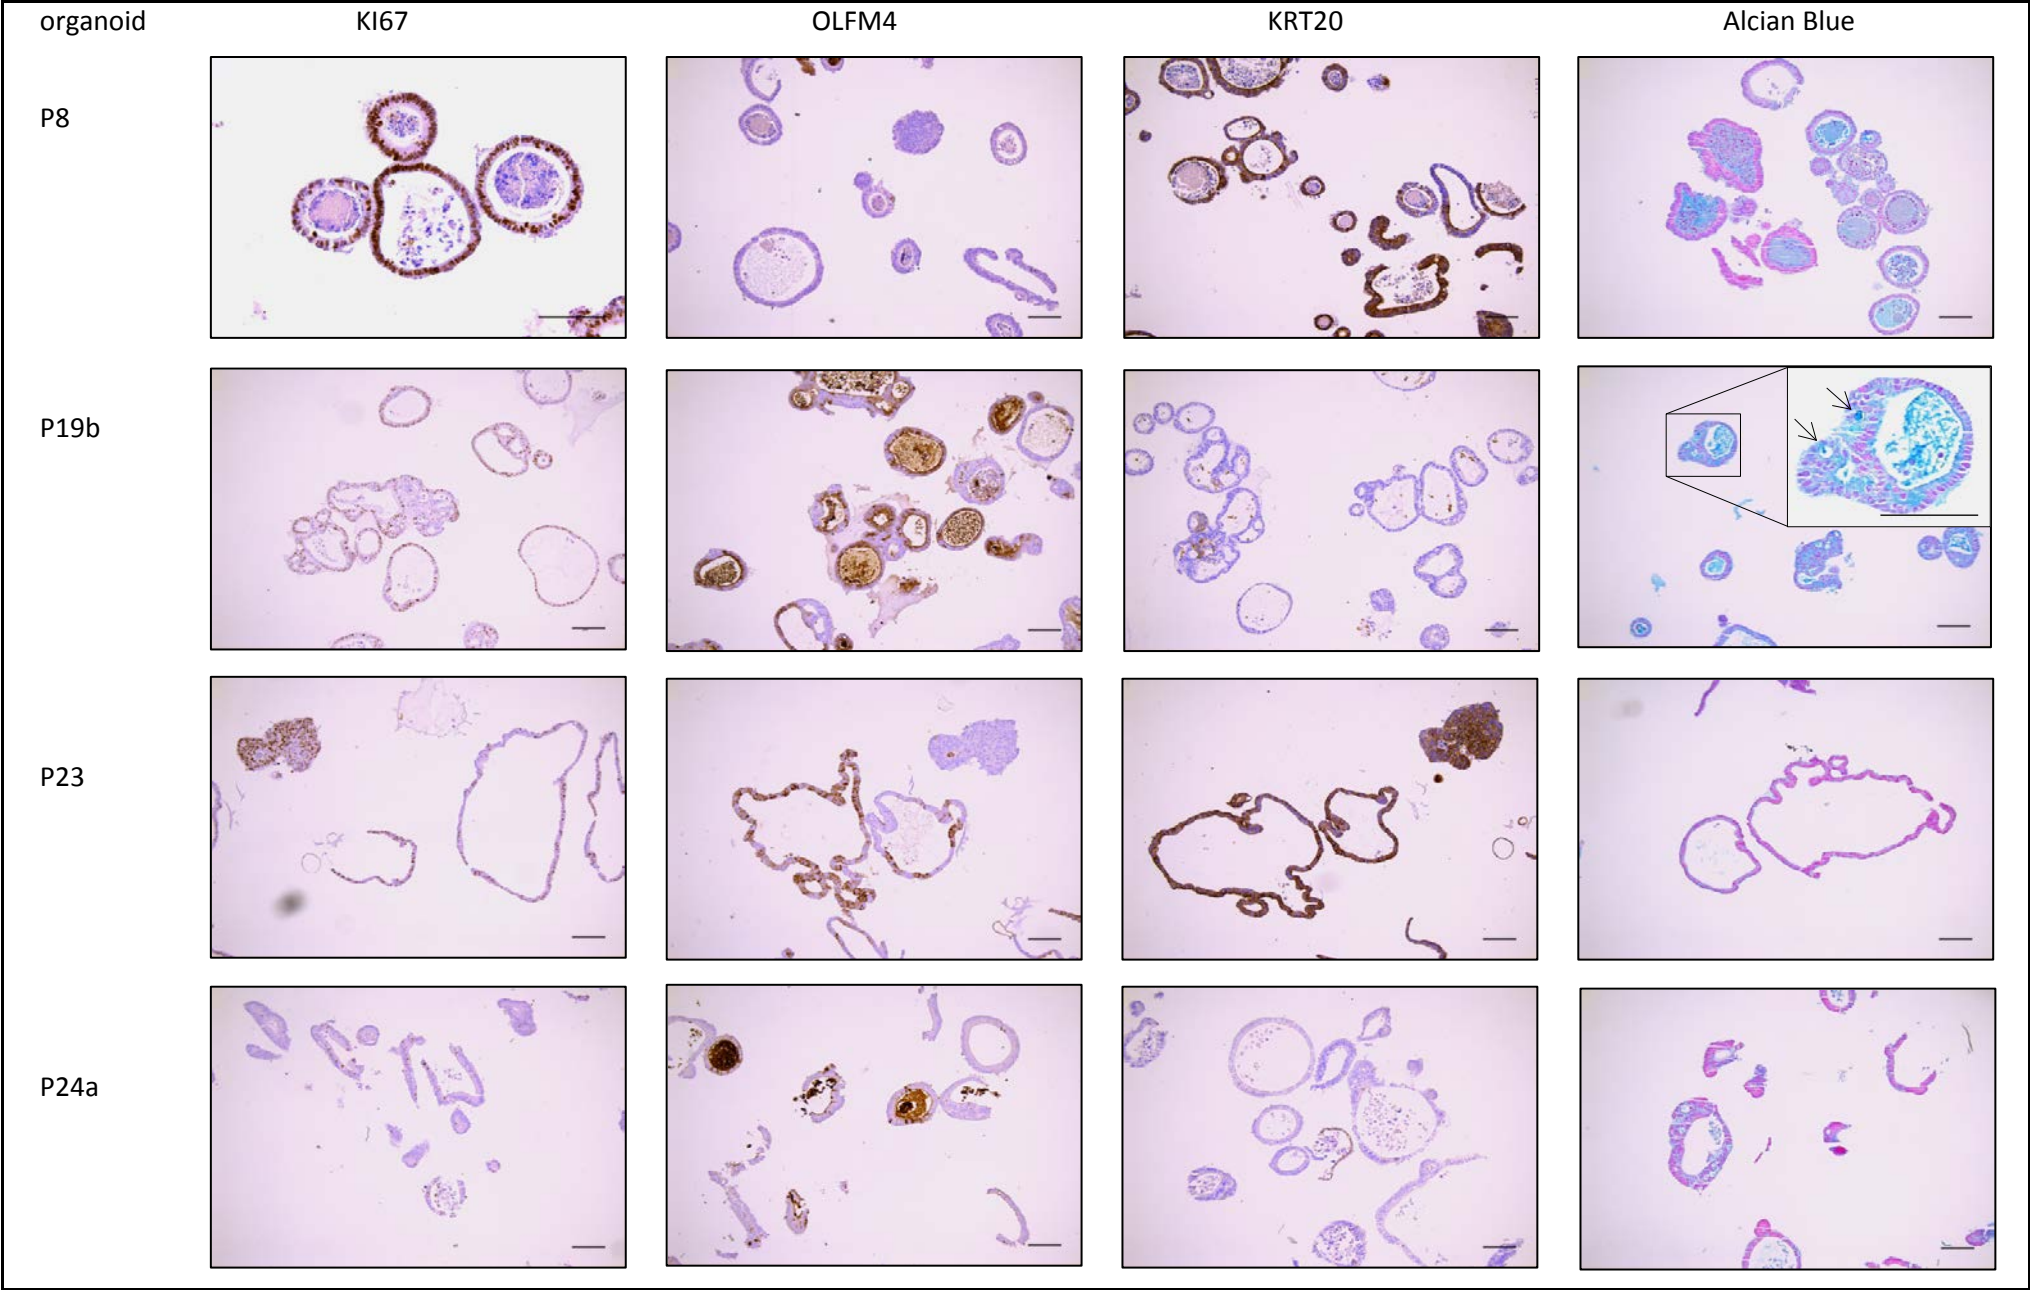

Supplement: NIHMS82103-supplement-Supp_data_file_S1.pdf [file NIHMS82103-supplement-Supp_data_file_S1.pdf]
