# Supplementary material
Source: PubMed Central journal article supplement (PMC6428276)

Figure S3

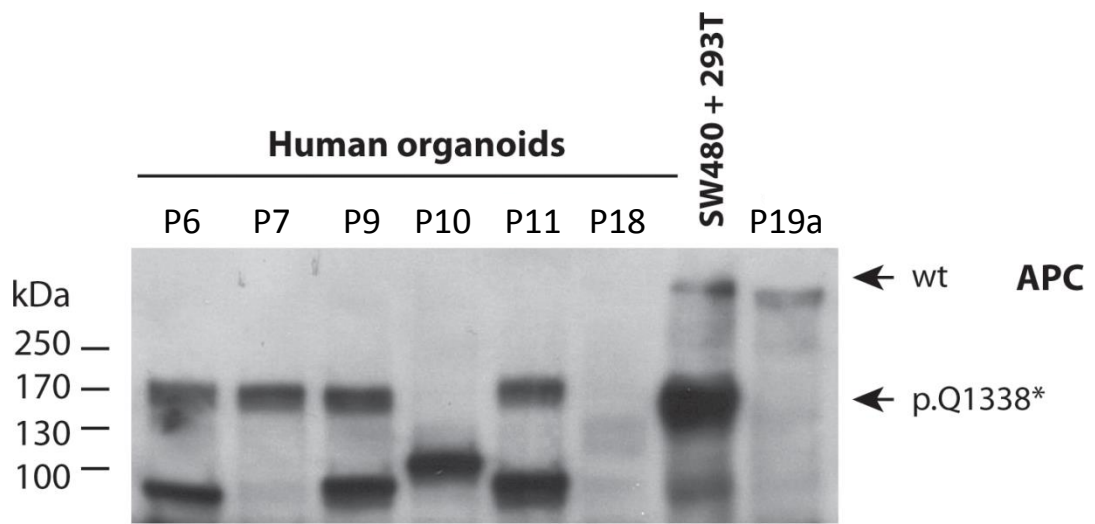

Supplement: NIHMS82103-supplement-Figure_S3.pdf [file NIHMS82103-supplement-Figure_S3.pdf]

Figure S4

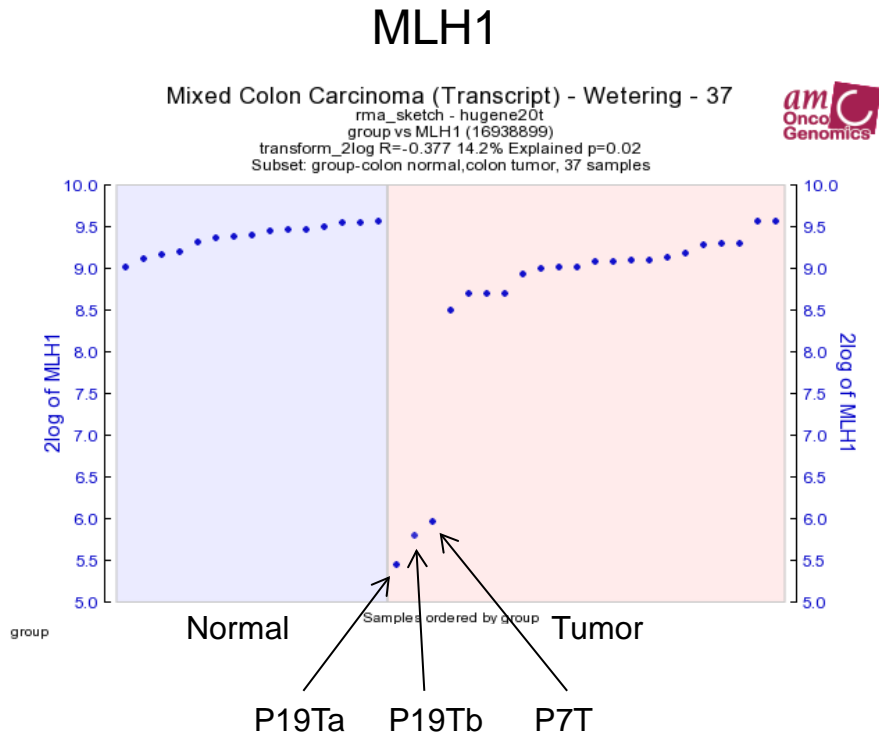

Supplement: NIHMS82103-supplement-Figure_S4.pdf [file NIHMS82103-supplement-Figure_S4.pdf]

Figure S5

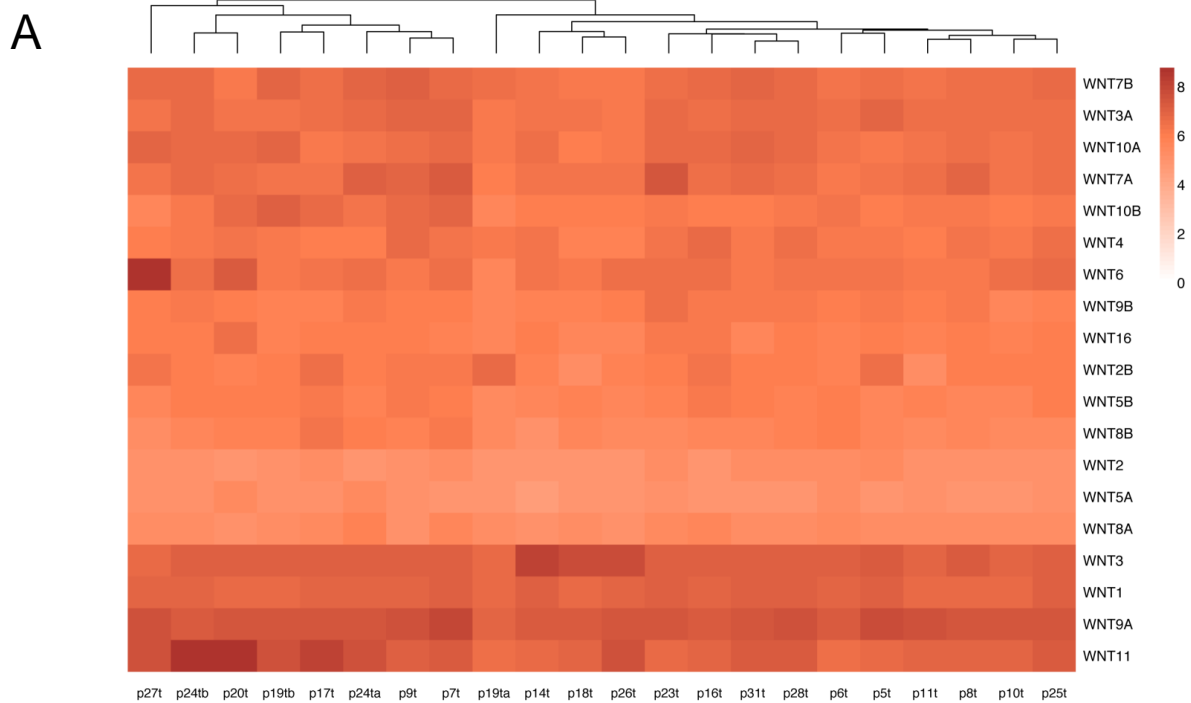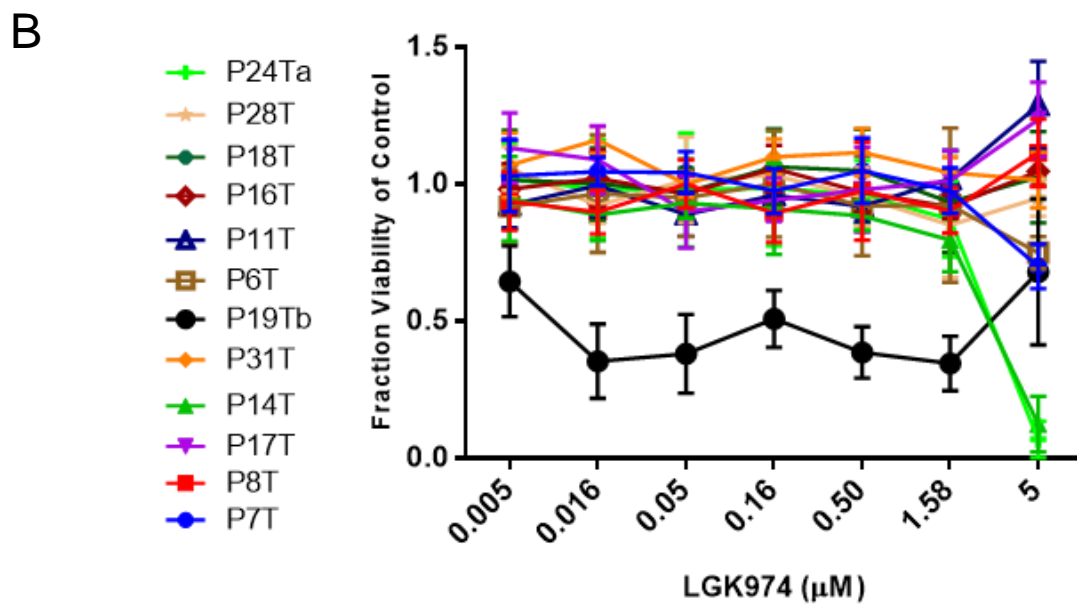

Supplement: NIHMS82103-supplement-Figure_S5.pdf [file NIHMS82103-supplement-Figure_S5.pdf]

# Supplementary Figure 6

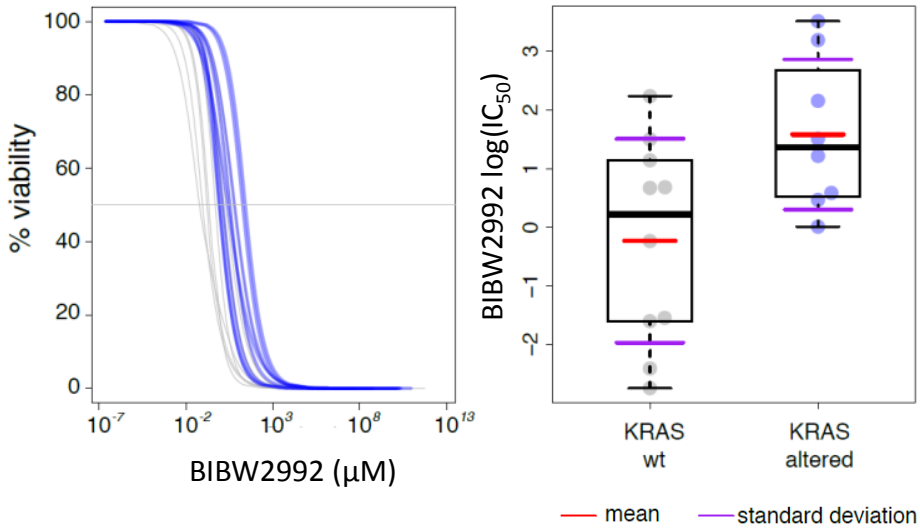

Supplement: NIHMS82103-supplement-Figure_S6.pdf [file NIHMS82103-supplement-Figure_S6.pdf]

# Run 1

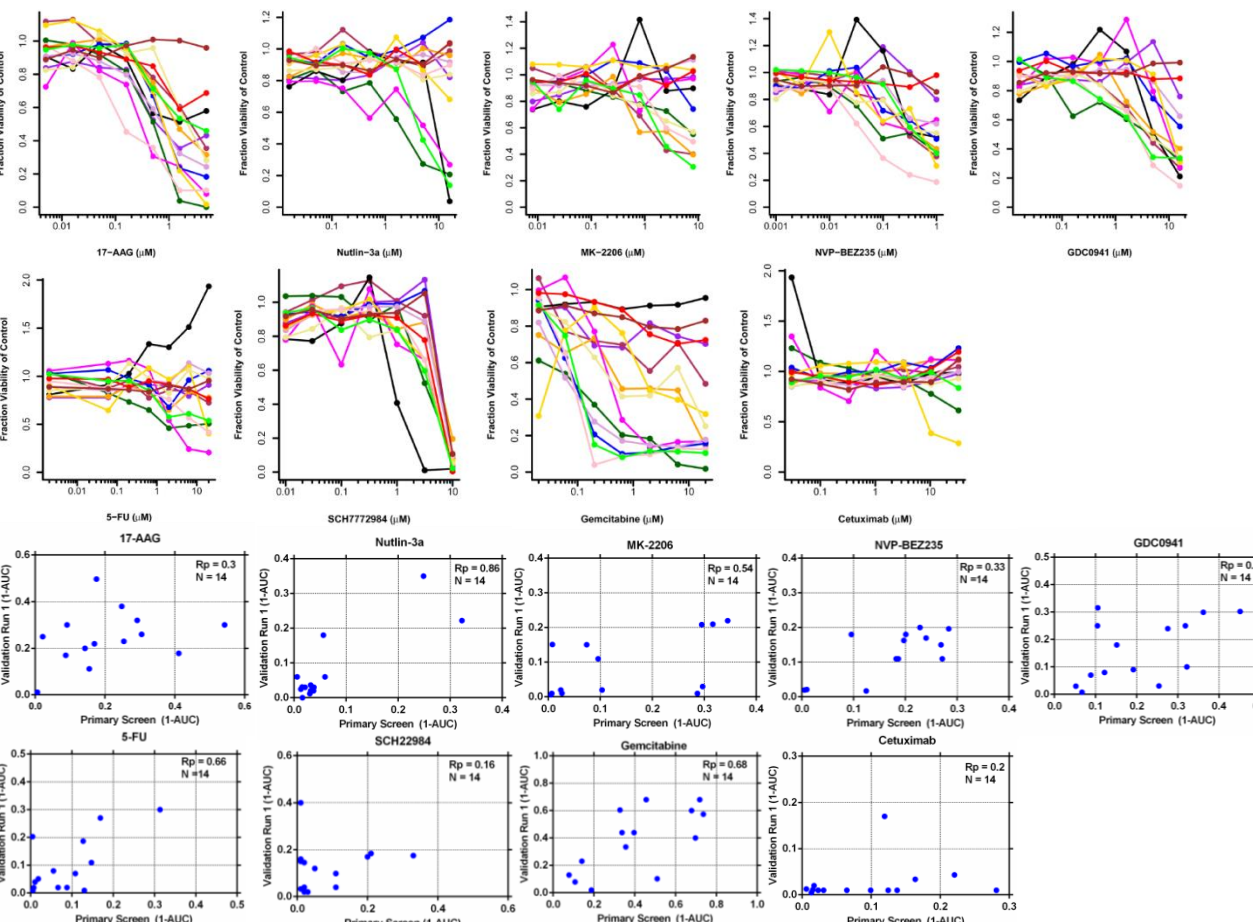

# Run 2

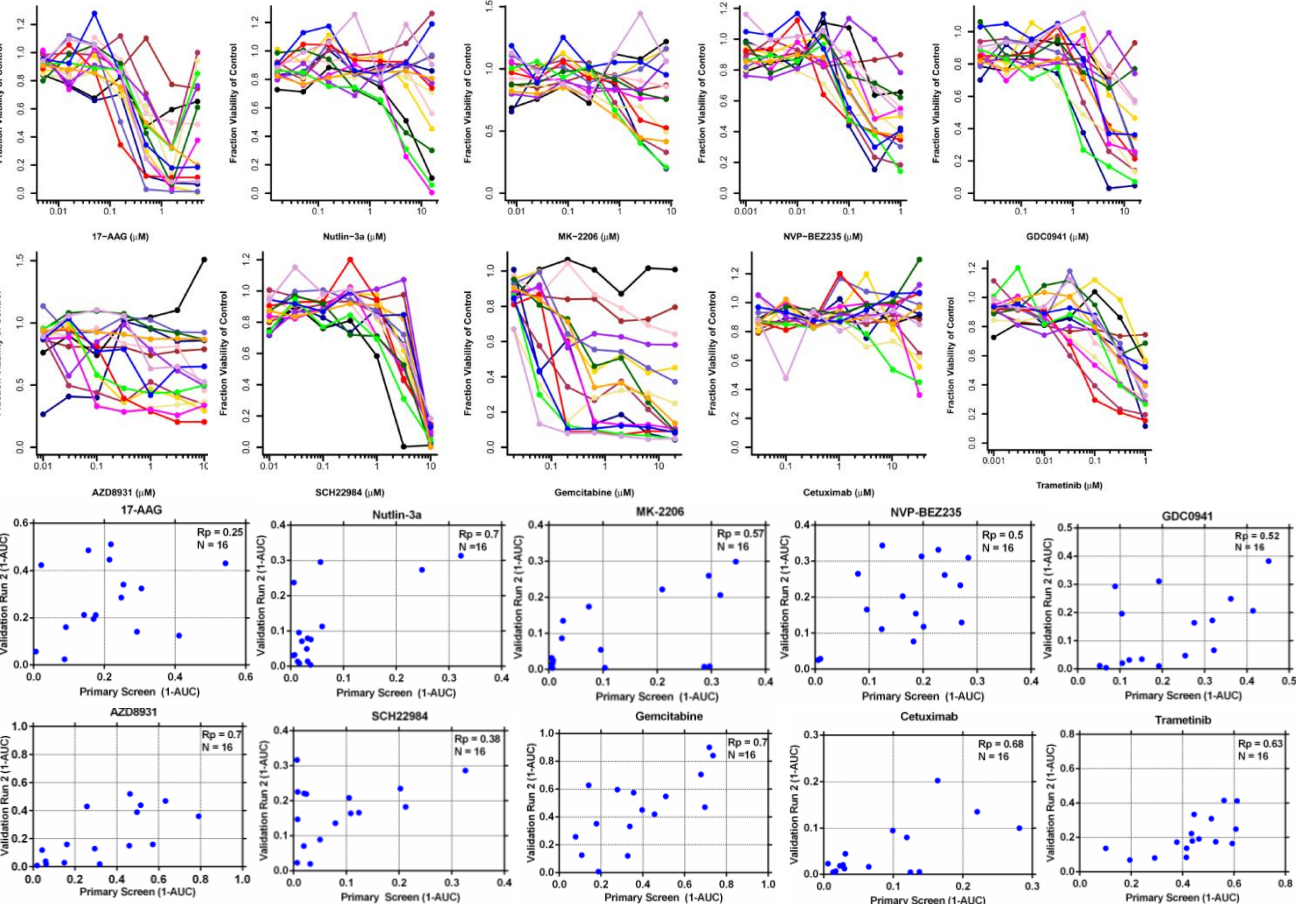

Supplement: NIHMS82103-supplement-Figure_S7.pdf [file NIHMS82103-supplement-Figure_S7.pdf]

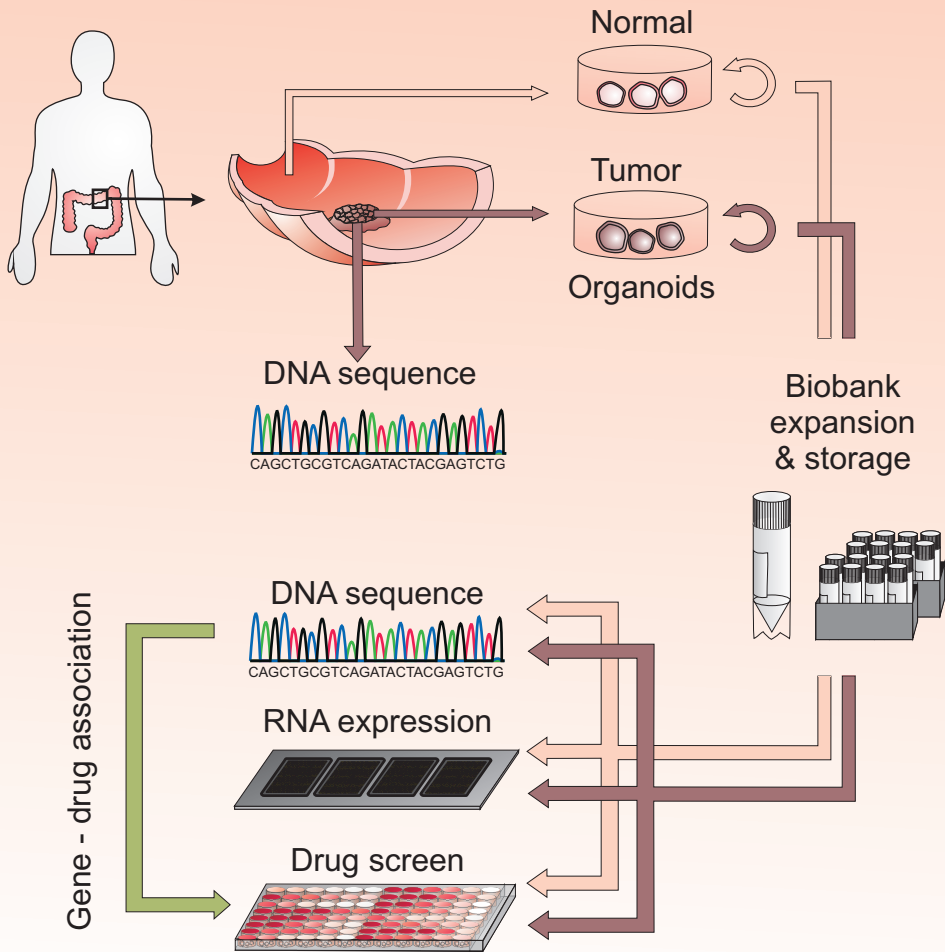

Supplement: NIHMS82103-supplement-graphical_abstract.pdf [file NIHMS82103-supplement-graphical_abstract.pdf]
